# Supplementary material for: Near-trench slip potential of megaquakes evaluated from fault properties and conditions
Source: PubMed Central journal article supplement (PMC4913312; doi:10.1038/srep28184), 2016-06-20
Supplement: srep28184-s1.pdf [file srep28184-s1.pdf]

## SUPPLEMENTARY INFORMATION

### **Near-trench slip potential of megaquakes evaluated from fault properties and conditions**

Tetsuro Hirono<sup>1\*</sup>, Kenichi Tsuda<sup>2</sup>, Wataru Tanikawa<sup>3</sup>, Jean-Paul Ampuero<sup>4</sup>, Bunichiro Shibazaki<sup>5</sup>, Masataka Kinoshita<sup>6</sup> and James J. Mori<sup>7</sup>

<sup>1</sup> Department of Earth and Space Science, Graduate School of Science, Osaka University, Toyonaka, Osaka 560-0043, Japan.

<sup>2</sup> Center for Safety and Reliability Engineering, Institute of Technology Shimizu Corporation, Koto, Tokyo 135-8530, Japan.

<sup>3</sup> Kochi Institute for Core Sample Research, Japan Agency for Marine–Earth Science and Technology, Nankoku, Kochi 783-8502, Japan.

<sup>4</sup> Division of Geological and Planetary Sciences, California Institute of Technology, Pasadena, CA 91125, U.S.A.

<sup>5</sup> International Institute of Seismology and Earthquake Engineering, Building Research Institute, Tsukuba, Ibaraki 305-0802, Japan.

<sup>6</sup> Earthquake Research Institute, University of Tokyo, Bunkyo, Tokyo 113-0032, Japan.

<sup>7</sup> Earthquake Hazards Division, Disaster Prevention Research Institute, Kyoto University, Uji, Kyoto 611-0011, Japan.

\* Corresponding author. Contact: [hirono@ess.sci.osaka-u.ac.jp](mailto:hirono@ess.sci.osaka-u.ac.jp)

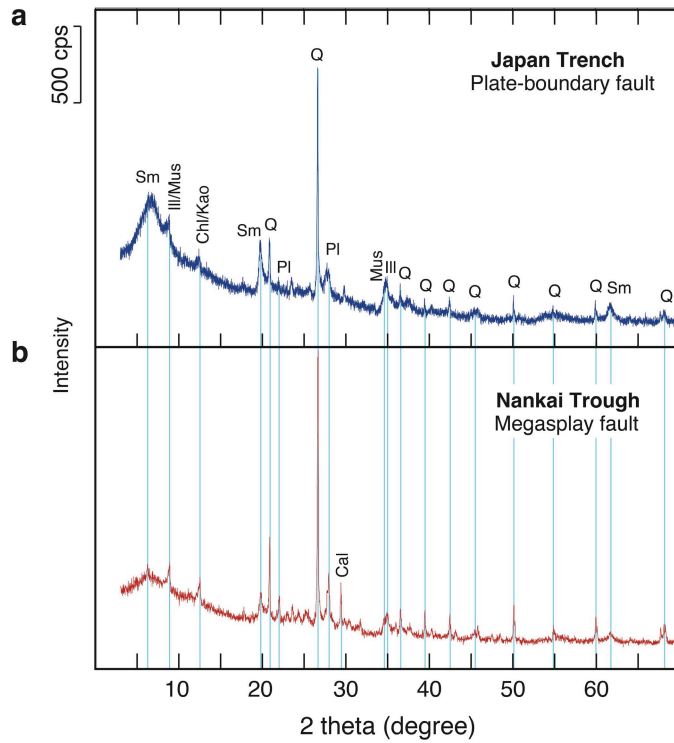

**Supplementary Figure S1. XRD patterns of the fault-zone materials. a**, Plate-boundary fault of the Japan Trench. **b**, Megasplay fault of the Nankai Trough. Sm, smectite; Ill, illite; Mus, muscovite; Chl, chlorite; Kao, kaolinite; Q, quartz; Pl, plagioclase; Cal, calcite; cps, counts per second.

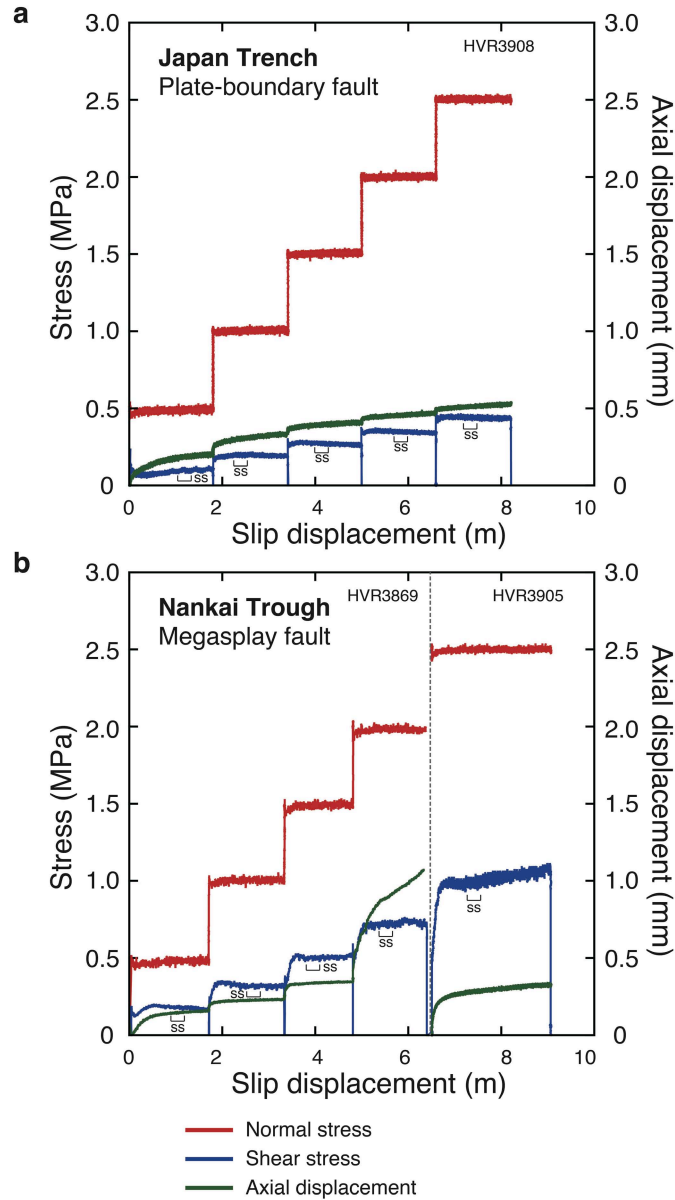

**Supplementary Figure S2. Frictional behaviours of the fault-zone materials. a,** Plate-boundary fault of the Japan Trench. **b,** Megasplay fault of the Nankai Trough. Experimental parameters were set to an equivalent slip velocity<sup>45</sup> of  $0.01 \text{ m s}^{-1}$ , normal stresses of 0.5–2.5 MPa, and slip displacements of 1–3 m. The steady state (ss) of the friction was confirmed at each normal stress to determine the friction coefficient. At the end of run HVR3869 sample leakage occurred, so an additional run (HVR3905) was performed.

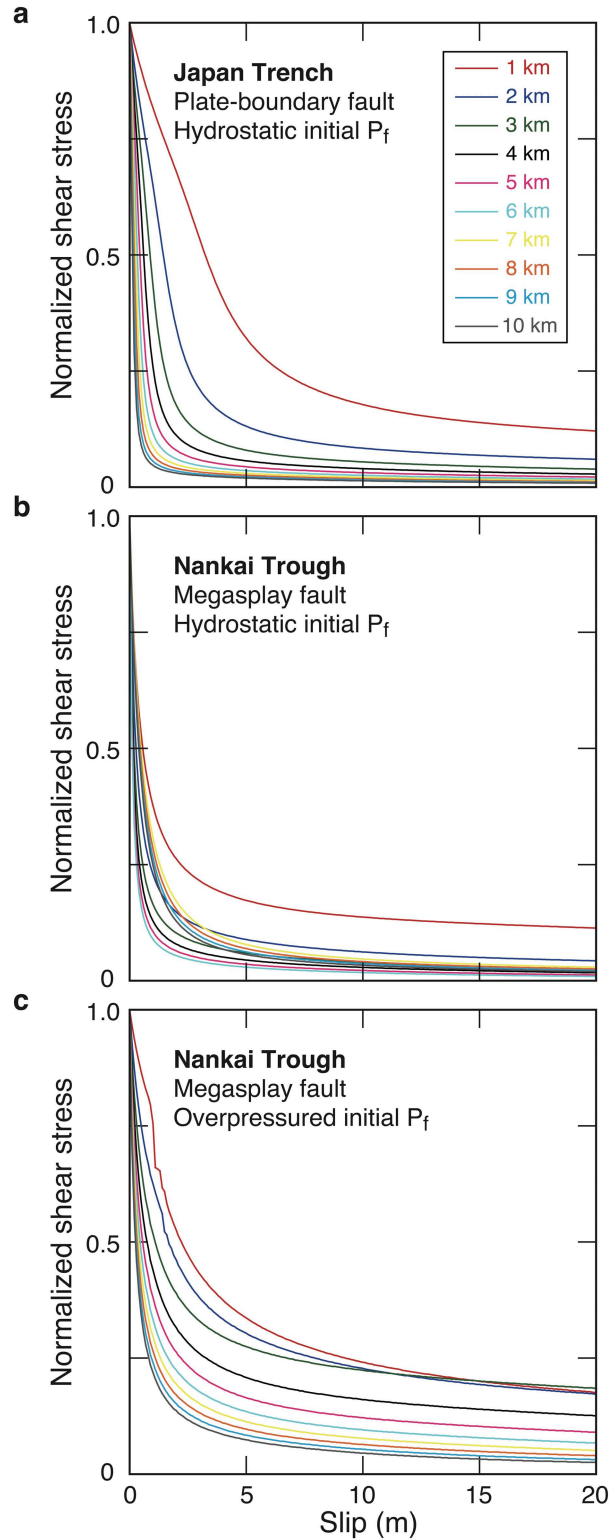

**Supplementary Figure S3. Changes of shear stress normalized by the initial value with slip at all depths. a,** Plate-boundary fault of the Japan Trench. **b,** Megasplay fault of the Nankai Trough under hydrostatic initial  $P_f$  condition. **c,** Megasplay fault of the Nankai Trough under overpressured initial  $P_f$  condition.

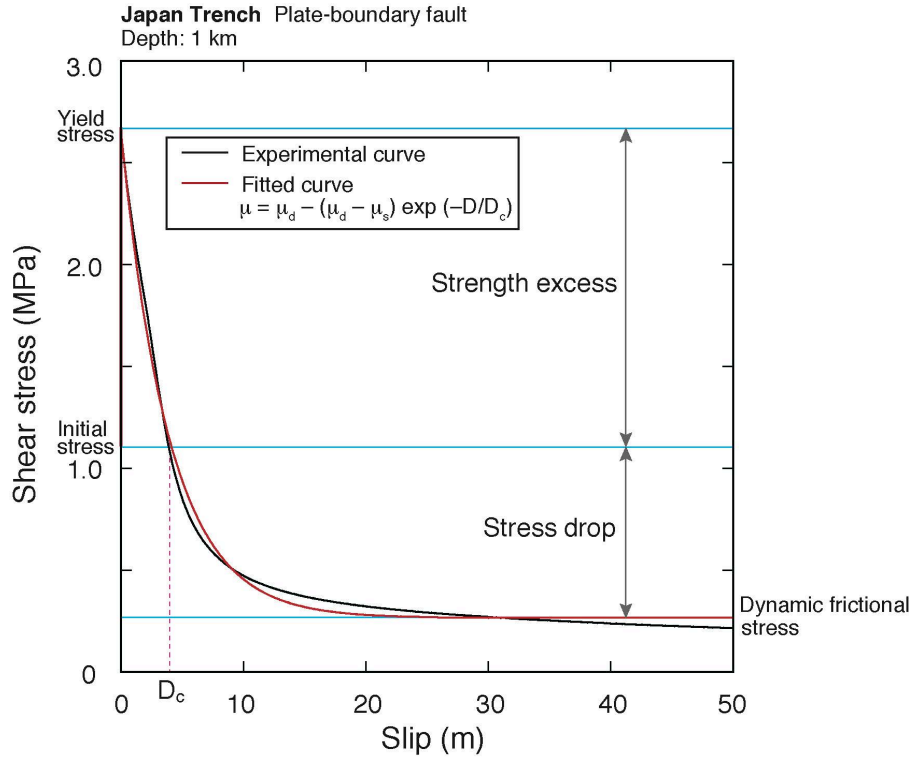

**Supplementary Figure S4. Curve fitting for dynamic rupture modelling.** An example from the Japan Trench plate-boundary fault at 1 km depth (dip, 15°). Strength excess = yield shear stress – initial shear stress, and stress drop = initial shear stress – dynamic frictional stress.  $D_c$ , Critical slip distance.

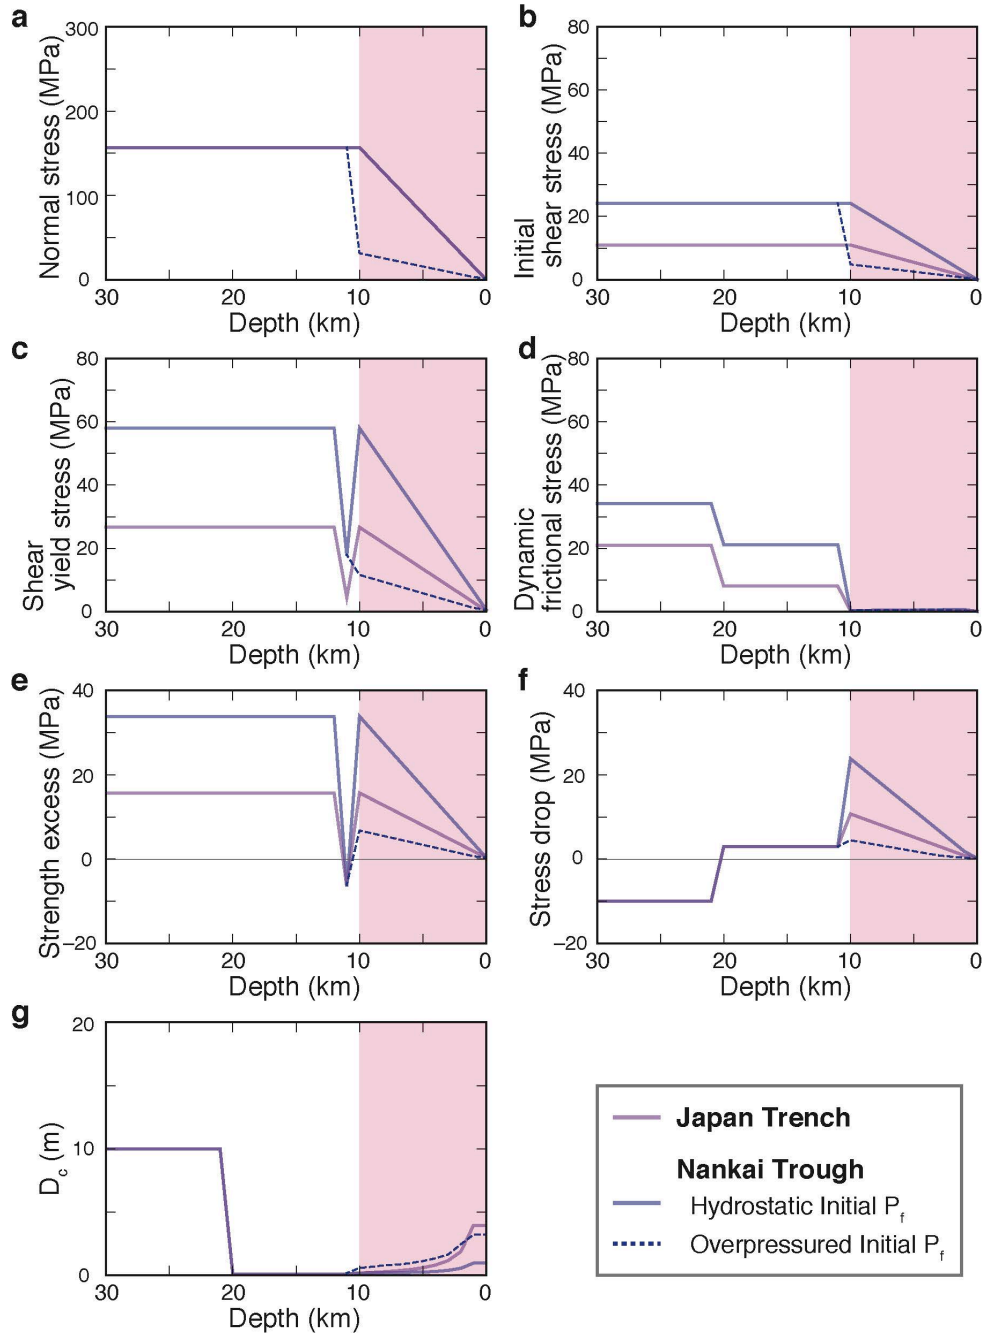

**Supplementary Figure S5. Model parameters for dynamic rupture propagation.** **a**, Normal stress. **b**, Initial shear stress. **c**, Yield shear stress. **d**, Dynamic frictional stress. **e**, Strength excess. **f**, Stress drop. **g**, Critical slip distance ( $D_c$ ). Earthquake nucleation was started at 11 km depth by prescribing a local reduction of yield stress (**c** and **e**). Pink shading shows the region where thermal pressurization occurred in our modelling. The dashed curves show the parameters for the simulations using the overpressured initial  $P_f$  condition at the Nankai Trough. Depth does not correspond to the distance from the trench along dip.

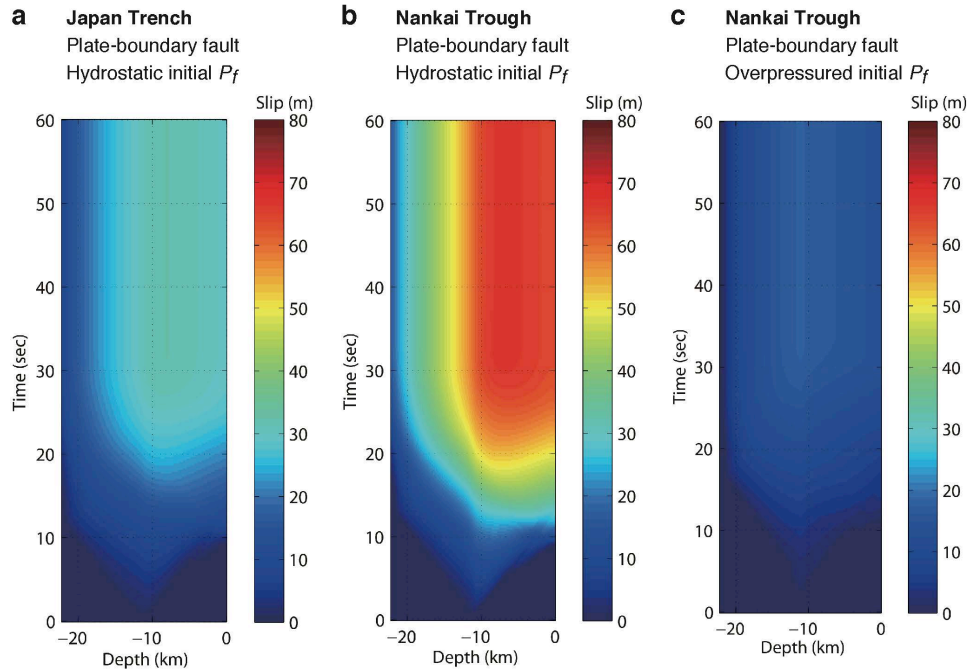

**Supplementary Figure S6. Time evolution of slip as a function of depth. a,** Plate-boundary fault (dip  $15^\circ$ ) in the Japan Trench at hydrostatic initial  $P_f$  condition. **b,** Plate-boundary fault (dip  $15^\circ$ ) in the Nankai Trough at hydrostatic initial  $P_f$  condition. **c,** Plate-boundary fault (dip  $15^\circ$ ) in the Nankai Trough at overpressured initial  $P_f$  condition. Depth does not correspond to the distance from the trench along dip.

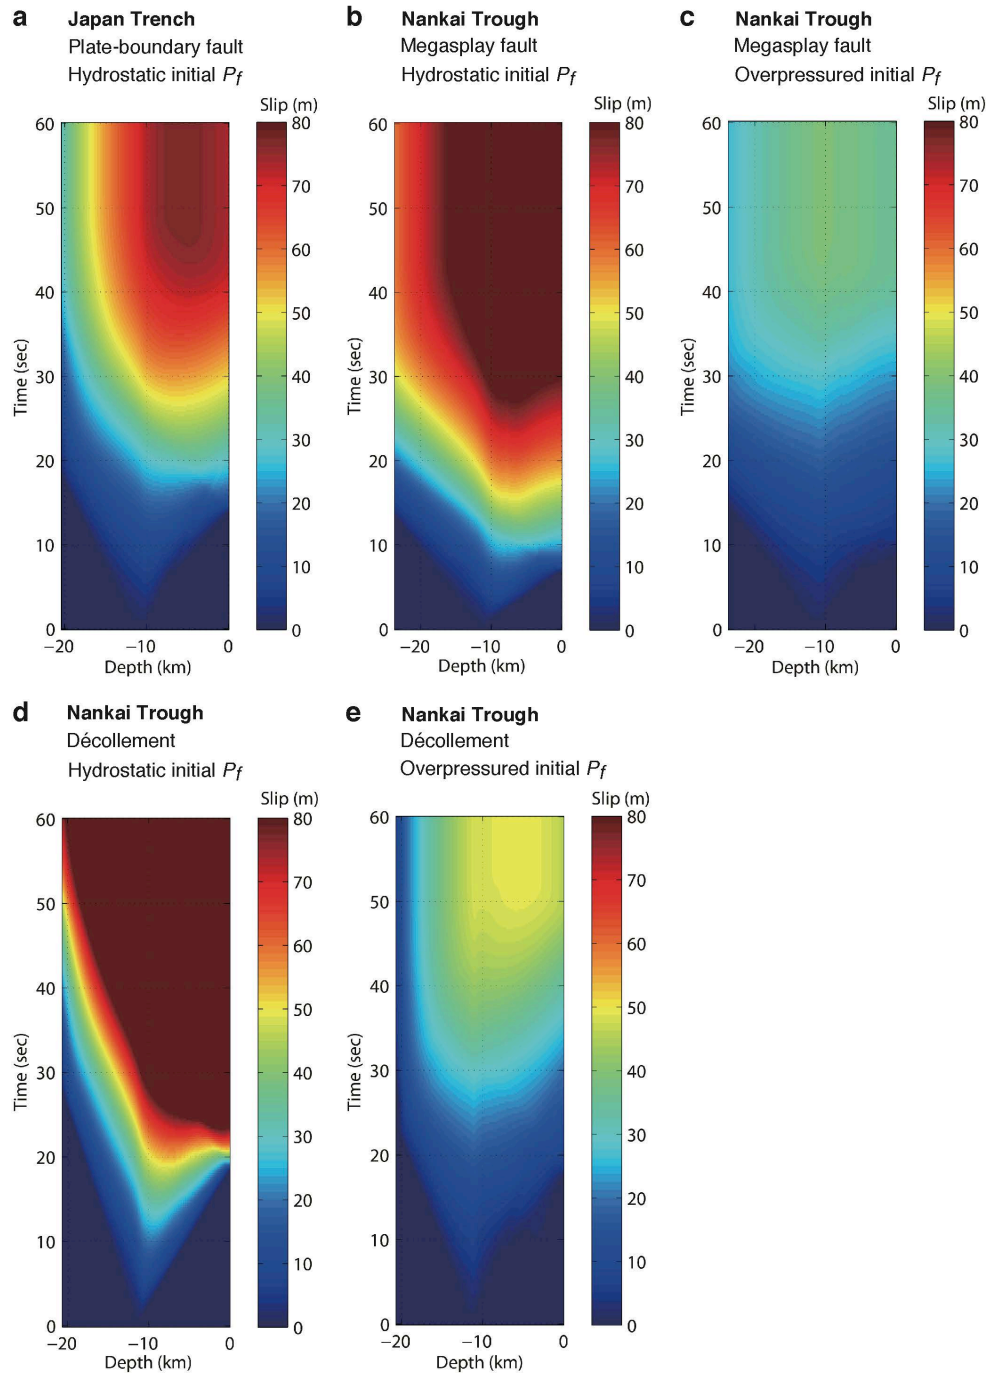

**Supplementary Figure S7. Time evolution of slip as a function of depth. a,** Plate-boundary fault (dip  $9^\circ$ ) in the Japan Trench at hydrostatic initial  $P_f$  condition. **b,** Megasplay fault (dip  $20^\circ$ ) in the Nankai Trough at hydrostatic initial  $P_f$  condition. **c,** Megasplay fault (dip  $20^\circ$ ) in the Nankai Trough at overpressured initial  $P_f$  condition. **d,** Décollement (dip  $7^\circ$ ) at the Nankai Trough at hydrostatic initial  $P_f$  condition. **e,** Décollement (dip  $7^\circ$ ) at the Nankai Trough at hydrostatic initial  $P_f$  condition.



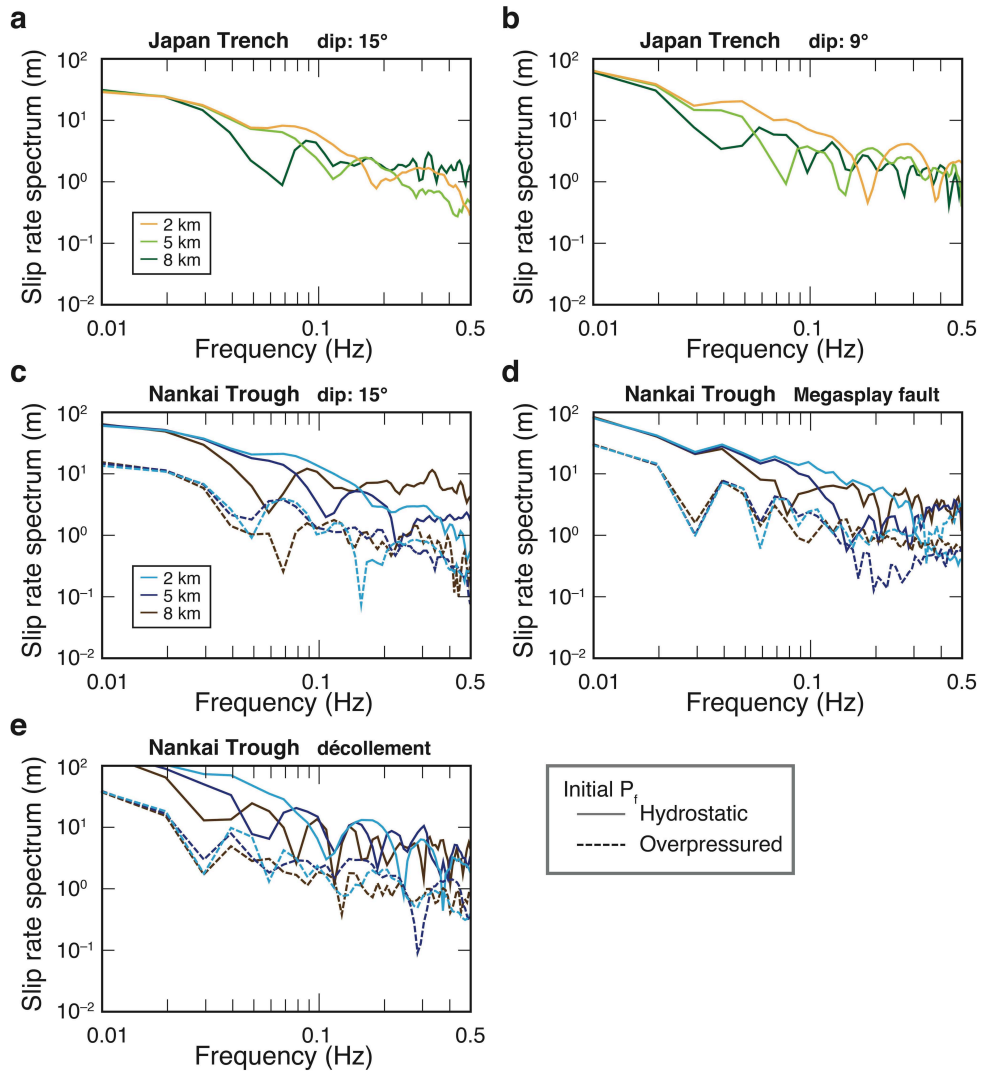

**Supplementary Figure S8. Frequency spectra of slip rate.** **a**, Ideal plate interface with 15° dip in the Japan Trench. **b**, Plate-boundary fault in the Japan Trench. **c**, Ideal plate interface with 15° dip in the Nankai Trough. **d**, Megasplay fault at the Nankai Trough. **e**, Décollement at the Nankai Trough. The dashed curves show the results of simulations using the overpressured initial  $P_f$  condition.

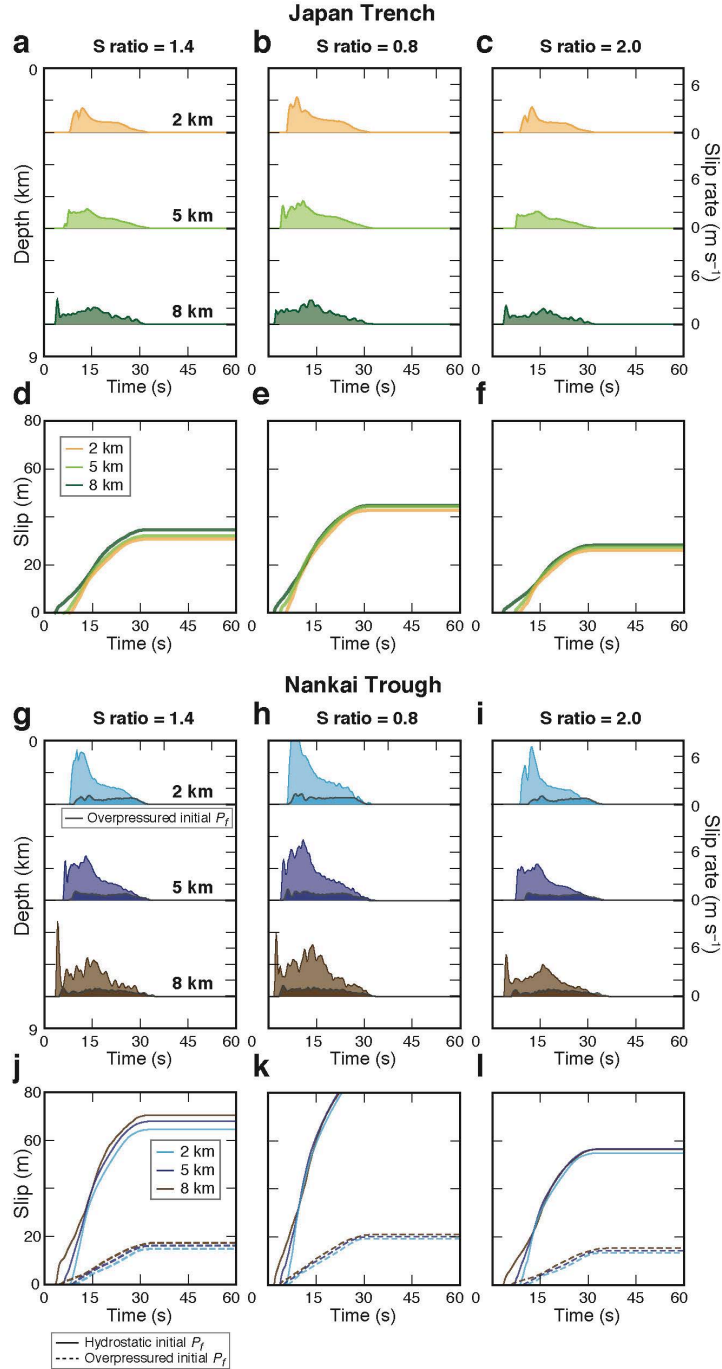

**Supplementary Figure S9. Spatio-temporal distribution of near-trench earthquake slip for different  $S$  ratios.** **a–c**, Slip rate as a function of time at representative depths (2, 5 and 8 km) along ideal plate-boundary fault with  $15^\circ$  dip in the Japan Trench for various  $S$  ratios (**a**, 1.4, **b**, 0.8 and **c**, 2.0). **d–f**, Accumulation of slip with time at each depth and  $S$  ratio. **g–i**, Slip rate as a function of time at representative depths (2, 5 and 8 km) along ideal plate-boundary fault with  $15^\circ$  dip in the Nankai Trough for various  $S$  ratios (**g**, 1.4, **h**, 0.8 and **i**, 2.0). **j–l**, Accumulation of slip with time at each depth and  $S$  ratio. The dashed curves show the results of simulations using the overpressured initial  $P_f$  condition.

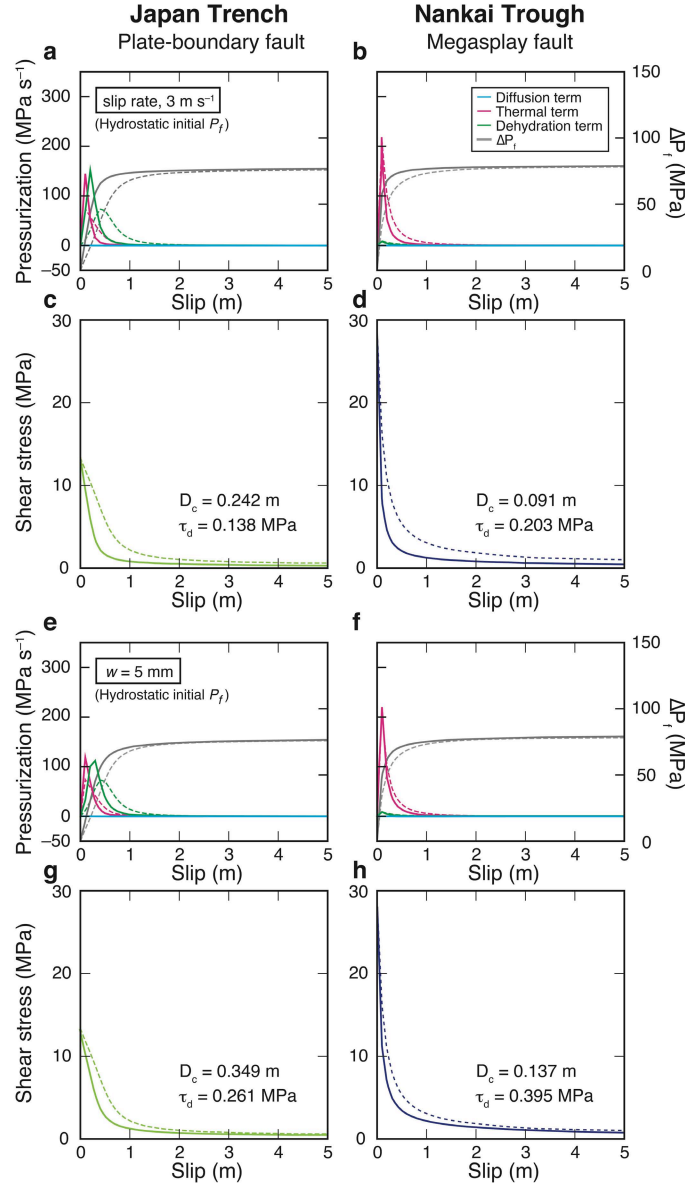

**Supplementary Figure S10. Thermal pressurization modelling with a fast slip rate and a thin slip zone under hydrostatic initial  $P_f$  condition.** **a, b**, Contributions of the diffusion, thermal, and dehydration terms of equation (1) to the pressurization of interstitial fluid ( $P_f$ ) at the centre of the slip zone for a slip rate of  $3 \text{ m s}^{-1}$  at 5 km depth. The dashed lines show the results for a slip rate of  $1 \text{ m s}^{-1}$  (Fig. 2). **c, d**, Changes of shear stress averaged within the slip zone of the plate-boundary fault of the Japan Trench (left) and of the megasplay fault of the Nankai Trough (right).  $D_c$ , critical slip distance;  $\tau_d$ , dynamic frictional stress. **e, f**, Contribution to the pressurization of interstitial fluid at the centre of a slip zone with a thickness of 5 mm at 5 km depth. The dashed lines show the results for a slip zone with a thickness of 10 mm (Fig. 2). **g, h**, Changes of shear stress averaged within the slip zone. Other parameters used in the TP modelling were set to the same values as those used in the modelling with a  $1 \text{ m s}^{-1}$  slip rate and a slip zone thickness of 10 mm, described in the main text.

## Supplementary Table S1. Original data sheet for the mineral assemblage output by the RockJock program

| Selected minerals                        | J-FAST<br>Scaly clay<br>(821.71–821.73<br>m)<br>[17R1, 21–23<br>cm] | J-FAST<br>Scaly clay<br>(822.04–822.06<br>m)<br>[17R1, 54–56<br>cm] | J-FAST<br>Scaly clay<br>(822.34–822.35<br>m)<br>[17R1, 84–85<br>cm] | J-FAST<br>Scaly clay<br>(822.50–822.51<br>m)<br>[17R1, 100–101<br>cm] | J-FAST<br>Scaly<br>clay<br>[Average] | NanTroSEIZE<br>Dark gouge<br>(271.13–271.14<br>m)<br>[28R2, 22–23 cm] | NanTroSEIZE<br>Scaly clay<br>(271.40–<br>271.42 m)<br>[28R2, 49–51<br>cm] |
|------------------------------------------|---------------------------------------------------------------------|---------------------------------------------------------------------|---------------------------------------------------------------------|-----------------------------------------------------------------------|--------------------------------------|-----------------------------------------------------------------------|---------------------------------------------------------------------------|
| Quartz                                   | 11.3                                                                | 13.7                                                                | 9.0                                                                 | 8.7                                                                   | 10.7                                 | 24.8                                                                  | 20.7                                                                      |
| Kspar (ordered microcline)               | 0.0                                                                 | 0.6                                                                 | 0.0                                                                 | 0.0                                                                   | 0.1                                  | 0.0                                                                   | 0.0                                                                       |
| Kspar (intermediate microcline)          | 1.9                                                                 | 0.8                                                                 | 0.0                                                                 | 0.0                                                                   | 0.7                                  | 1.7                                                                   | 2.4                                                                       |
| Kspar (sanidine)                         | 1.4                                                                 | 0.0                                                                 | 3.1                                                                 | 4.0                                                                   | 2.1                                  | 0.0                                                                   | 0.6                                                                       |
| Kspar (orthoclase)                       | 4.3                                                                 | 6.7                                                                 | 6.1                                                                 | 5.1                                                                   | 5.5                                  | 3.2                                                                   | 3.8                                                                       |
| Kspar (anorthoclase)                     | 0.0                                                                 | 0.2                                                                 | 0.1                                                                 | 0.4                                                                   | 0.2                                  | 0.2                                                                   | 0.0                                                                       |
| Plagioclase (albite, var. cleavelandite) | 6.6                                                                 | 5.9                                                                 | 3.5                                                                 | 3.0                                                                   | 4.7                                  | 9.1                                                                   | 9.9                                                                       |
| Plagioclase (oligoclase; NC)             | 0.0                                                                 | 0.0                                                                 | 0.1                                                                 | 0.0                                                                   | 0.0                                  | 3.4                                                                   | 0.0                                                                       |
| Plagioclase (oligoclase; Norway)         | 0.6                                                                 | 0.0                                                                 | 2.0                                                                 | 0.1                                                                   | 0.7                                  | 0.2                                                                   | 3.3                                                                       |
| Plagioclase (andesine)                   | 2.7                                                                 | 2.9                                                                 | 0.0                                                                 | 0.2                                                                   | 1.5                                  | 1.9                                                                   | 1.5                                                                       |
| Plagioclase (labradorite)                | 0.0                                                                 | 0.0                                                                 | 0.8                                                                 | 2.1                                                                   | 0.7                                  | 0.0                                                                   | 0.0                                                                       |
| Plagioclase (bytownite)                  | 1.8                                                                 | 1.9                                                                 | 0.8                                                                 | 1.3                                                                   | 1.4                                  | 3.5                                                                   | 3.8                                                                       |
| Plagioclase (anorthite)                  | 1.2                                                                 | 1.2                                                                 | 0.0                                                                 | 0.6                                                                   | 0.8                                  | 0.0                                                                   | 0.0                                                                       |
| Calcite                                  | 0.0                                                                 | 0.0                                                                 | 0.0                                                                 | 0.0                                                                   | 0.0                                  | 4.6                                                                   | 4.2                                                                       |
| Dolomite                                 | 0.0                                                                 | 0.0                                                                 | 0.0                                                                 | 0.0                                                                   | 0.0                                  | 0.0                                                                   | 0.3                                                                       |
| Ankerite                                 | 0.0                                                                 | 0.0                                                                 | 0.0                                                                 | 0.0                                                                   | 0.0                                  | 0.0                                                                   | 0.0                                                                       |
| Magnesite                                | 0.0                                                                 | 0.0                                                                 | 0.0                                                                 | 0.0                                                                   | 0.0                                  | 0.0                                                                   | 0.0                                                                       |
| Siderite                                 | 0.0                                                                 | 0.0                                                                 | 0.0                                                                 | 0.0                                                                   | 0.0                                  | 0.0                                                                   | 0.0                                                                       |
| Halite                                   | 0.0                                                                 | 0.0                                                                 | 0.0                                                                 | 0.0                                                                   | 0.0                                  | 0.7                                                                   | 0.5                                                                       |
| Pyrite                                   | 0.3                                                                 | 0.1                                                                 | 0.1                                                                 | 0.2                                                                   | 0.2                                  | 0.6                                                                   | 0.8                                                                       |
| Gypsum                                   | 0.0                                                                 | 0.1                                                                 | 0.1                                                                 | 0.0                                                                   | 0.1                                  | 0.0                                                                   | 0.0                                                                       |
| Magnetite                                | 0.0                                                                 | 0.0                                                                 | 0.1                                                                 | 0.0                                                                   | 0.0                                  | 0.0                                                                   | 0.0                                                                       |
| Hematite                                 | 0.0                                                                 | 0.1                                                                 | 0.0                                                                 | 0.0                                                                   | 0.0                                  | 0.0                                                                   | 0.0                                                                       |
| Goethite                                 | 0.0                                                                 | 0.0                                                                 | 0.6                                                                 | 0.2                                                                   | 0.2                                  | 0.0                                                                   | 0.0                                                                       |
| Maghemite                                | 0.0                                                                 | 0.0                                                                 | 0.0                                                                 | 0.0                                                                   | 0.0                                  | 0.0                                                                   | 0.0                                                                       |
| Total non-clay minerals                  | 31.9                                                                | 34.1                                                                | 26.3                                                                | 26.0                                                                  | 29.6                                 | 53.9                                                                  | 51.8                                                                      |
| Kaolinite (disordered)                   | 0.0                                                                 | 1.3                                                                 | 3.6                                                                 | 4.0                                                                   | 2.3                                  | 4.4                                                                   | 3.1                                                                       |
| Kaolinite (ordered)                      | 2.4                                                                 | 2.4                                                                 | 0.0                                                                 | 0.0                                                                   | 1.2                                  | 0.1                                                                   | 0.0                                                                       |
| Smectite (Na-Kinney montmorillonite)     | 8.1                                                                 | 2.4                                                                 | 11.7                                                                | 10.1                                                                  | 8.1                                  | 0.0                                                                   | 10.4                                                                      |
| Smectite (Ca-Kinney montmorillonite)     | 26.7                                                                | 26.6                                                                | 17.2                                                                | 19.6                                                                  | 22.5                                 | 10.8                                                                  | 0.0                                                                       |
| Smectite (Saponite)                      | 9.4                                                                 | 7.2                                                                 | 2.9                                                                 | 6.1                                                                   | 6.4                                  | 0.6                                                                   | 2.1                                                                       |
| Illite (1Md)                             | 0.0                                                                 | 0.0                                                                 | 0.8                                                                 | 0.0                                                                   | 0.2                                  | 2.7                                                                   | 8.7                                                                       |
| Illite (1M; R>3; 95%)                    | 0.0                                                                 | 0.9                                                                 | 5.7                                                                 | 6.2                                                                   | 3.2                                  | 12.8                                                                  | 1.1                                                                       |
| Illite (R>1, 70-80%)                     | 3.2                                                                 | 3.4                                                                 | 16.2                                                                | 16.1                                                                  | 9.7                                  | 0.5                                                                   | 0.0                                                                       |
| Illite (1M; RM30)                        | 1.5                                                                 | 4.8                                                                 | 1.5                                                                 | 0.1                                                                   | 2.0                                  | 0.2                                                                   | 2.4                                                                       |
| Chlorite (CCa-2)                         | 1.2                                                                 | 1.1                                                                 | 0.0                                                                 | 0.4                                                                   | 0.7                                  | 3.9                                                                   | 2.0                                                                       |
| Chlorite (CMM)                           | 0.0                                                                 | 0.0                                                                 | 1.0                                                                 | 1.4                                                                   | 0.6                                  | 0.8                                                                   | 0.1                                                                       |
| Chlorite (Fe-rich; Tusc)                 | 0.0                                                                 | 0.0                                                                 | 0.0                                                                 | 0.6                                                                   | 0.2                                  | 0.9                                                                   | 6.7                                                                       |
| Chlorite (Mg; Luzenac)                   | 0.4                                                                 | 0.0                                                                 | 0.3                                                                 | 0.0                                                                   | 0.2                                  | 0.8                                                                   | 2.0                                                                       |
| Muscovite (2M1)                          | 15.2                                                                | 15.7                                                                | 12.9                                                                | 9.5                                                                   | 13.3                                 | 7.6                                                                   | 9.6                                                                       |
| Total clay minerals                      | 68.1                                                                | 65.9                                                                | 73.7                                                                | 74.0                                                                  | 70.4                                 | 46.1                                                                  | 48.2                                                                      |

**Supplementary Table S2. Parameters used in the thermal pressurization modelling**

| Parameters                                       | Japan Trench                                              |                                   |                                            | Nankai Trough                                 |                                   |                                            |
|--------------------------------------------------|-----------------------------------------------------------|-----------------------------------|--------------------------------------------|-----------------------------------------------|-----------------------------------|--------------------------------------------|
|                                                  | Unit                                                      | Remark/<br>Reference              | Unit                                       | Remark/<br>Reference                          |                                   |                                            |
| <i>Physical properties</i>                       |                                                           |                                   |                                            |                                               |                                   |                                            |
| Density of solid matrix in slip zone             | 2.46                                                      | g cm <sup>-3</sup>                | 2.41                                       | g cm <sup>-3</sup>                            |                                   |                                            |
| Density of fluid                                 | 1.00                                                      | g cm <sup>-3</sup>                | 1.00                                       | g cm <sup>-3</sup>                            |                                   |                                            |
| Bulk density of host rock                        | 2.60                                                      | g cm <sup>-3</sup>                | 2.60                                       | g cm <sup>-3</sup>                            |                                   |                                            |
| Compressibility of fluid                         | 4.30 × 10 <sup>-10</sup>                                  | Pa <sup>-1</sup>                  | ref. 111                                   | 4.30 × 10 <sup>-10</sup>                      | Pa <sup>-1</sup>                  | ref. 111                                   |
| Friction coefficient ( $\mu$ )                   | 0.17                                                      |                                   |                                            | 0.37                                          |                                   |                                            |
| <i>Environmental conditions</i>                  |                                                           |                                   |                                            |                                               |                                   |                                            |
| Normalized pore-pressure ratio                   | hydrostatic                                               | ref. 17                           | hydrostatic or 0.8                         | ref. 18                                       |                                   |                                            |
| Geothermal gradient                              | 26.3                                                      | °C km <sup>-1</sup>               | ref. 112                                   | 37.4                                          | °C km <sup>-1</sup>               | ref. 113                                   |
| Temperature at seafloor                          | 3.4                                                       | °C                                |                                            | 2.9                                           | °C                                |                                            |
| Thickness of slip zone ( $w$ )                   | 0.01                                                      | m                                 |                                            | 0.01                                          | m                                 |                                            |
| Slip velocity                                    | 1.0                                                       | m s <sup>-1</sup>                 |                                            | 1.0                                           | m s <sup>-1</sup>                 |                                            |
| <i>Hydraulic properties</i>                      |                                                           |                                   |                                            |                                               |                                   |                                            |
| Initial porosity                                 | 93.037 × $P_{e0}^{-0.37725}$                              |                                   | $P_{e0}$ , initial effective pressure (Pa) | 3.1612 × $P_{e0}^{-0.12476}$                  |                                   | $P_{e0}$ , initial effective pressure (Pa) |
| Porosity- $P_e$ equation                         | porosity = $b \times P_e^c$                               |                                   | $P_e$ , effective pressure (Pa)            | porosity = $b \times P_e^c$                   |                                   | $P_e$ , effective pressure (Pa)            |
| Constant b                                       | $\phi_0/P_{e0}^c$                                         |                                   | $\phi_0$ , initial porosity                | $\phi_0/P_{e0}^c$                             |                                   |                                            |
| Constant c                                       | -0.1541                                                   |                                   |                                            | -0.27623                                      |                                   |                                            |
| Initial permeability                             | $2.6239 \times 10^{22} \times \exp(14.926 \times \phi_0)$ | m <sup>2</sup>                    |                                            | $0.00047799 \times P_{e0}^{-2.0562}$          | m <sup>2</sup>                    |                                            |
| Permeability- $P_e$ equation                     | $2.6239 \times 10^{22} \times \exp(14.926 \times \phi)$   | m <sup>2</sup>                    | $\phi = b \times P_e^c$                    | $d \times P_e^e$                              | m <sup>2</sup>                    |                                            |
| Constant d                                       | -                                                         |                                   |                                            | $k_0/P_{e0}^e$                                |                                   | $k_0$ , initial permeability               |
| Constant e                                       | -                                                         |                                   |                                            | -0.02473                                      |                                   |                                            |
| Viscosity of fluid                               | $2.414 \times 10^5 \times 10^{247.8/(T+133)}$             | Pa s                              | ref. 114                                   | $2.414 \times 10^5 \times 10^{247.8/(T+133)}$ | Pa s                              | ref. 114                                   |
| <i>Thermal properties</i>                        |                                                           |                                   |                                            |                                               |                                   |                                            |
| Specific heat capacity of solid matrix           | 1.00                                                      | J g <sup>-1</sup> K <sup>-1</sup> |                                            | 0.85                                          | J g <sup>-1</sup> K <sup>-1</sup> |                                            |
| Specific heat capacity of fluid                  | 4.20                                                      | J g <sup>-1</sup> K <sup>-1</sup> |                                            | 4.20                                          | J g <sup>-1</sup> K <sup>-1</sup> |                                            |
| Thermal diffusivity of solid matrix              | 6.0 × 10 <sup>-7</sup>                                    | m <sup>2</sup> s <sup>-1</sup>    | ref. 115                                   | 6.0 × 10 <sup>-7</sup>                        | m <sup>2</sup> s <sup>-1</sup>    | ref. 115                                   |
| Thermal diffusivity of fluid                     | 1.7 × 10 <sup>-7</sup>                                    | m <sup>2</sup> s <sup>-1</sup>    |                                            | 1.7 × 10 <sup>-7</sup>                        | m <sup>2</sup> s <sup>-1</sup>    |                                            |
| Coefficient of thermal expansion of solid matrix | 2.20 × 10 <sup>-5</sup>                                   | K <sup>-1</sup>                   | ref. 116 for quartz                        | 2.20 × 10 <sup>-5</sup>                       | K <sup>-1</sup>                   | ref. 116 for quartz                        |
| Coefficient of thermal expansion of fluid        | 5.00 × 10 <sup>-4</sup>                                   | K <sup>-1</sup>                   | ref. 111                                   | 5.00 × 10 <sup>-4</sup>                       | K <sup>-1</sup>                   | ref. 111                                   |
| <i>Chemical kinetics</i>                         |                                                           |                                   |                                            |                                               |                                   |                                            |
| $A_{p\_1st}$                                     | 4.27 × 10 <sup>4</sup>                                    | s <sup>-1</sup>                   |                                            | 3.47 × 10 <sup>1</sup>                        | s <sup>-1</sup>                   |                                            |
| $E_{a\_1st}$                                     | 52.1                                                      | kJ mol <sup>-1</sup>              |                                            | 27.7                                          | kJ mol <sup>-1</sup>              |                                            |
| Kinetic function of 1st-step dehydration         | F3                                                        |                                   |                                            | D3                                            |                                   |                                            |
| Enthalpy of 1st-step dehydration                 | 30.2                                                      | J g <sup>-1</sup>                 |                                            | 16.9                                          | J g <sup>-1</sup>                 |                                            |
| Weight loss of 1st-step dehydration              | 3.10                                                      | weight %                          |                                            | 1.66                                          | weight %                          |                                            |
| Volume loss of 1st-step dehydration              | 0.987                                                     |                                   |                                            | 0.993                                         |                                   |                                            |
| $A_{p\_2st}$                                     | 6.46 × 10 <sup>4</sup>                                    | s <sup>-1</sup>                   |                                            | 4.47 × 10 <sup>2</sup>                        | s <sup>-1</sup>                   |                                            |
| $E_{a\_2st}$                                     | 114.0                                                     | kJ mol <sup>-1</sup>              |                                            | 80.7                                          | kJ mol <sup>-1</sup>              |                                            |
| Kinetic function of 2nd-step dehydration         | An (n=0.5)                                                |                                   |                                            | F3                                            |                                   |                                            |
| Enthalpy of 2nd-step dehydration                 | 195.5                                                     | J g <sup>-1</sup>                 |                                            | 152.2                                         | J g <sup>-1</sup>                 |                                            |
| Weight loss of 2nd-step dehydration              | 4.30                                                      | weight %                          |                                            | 5.80                                          | weight %                          |                                            |
| Volume loss of 2nd-step dehydration              | 0.982                                                     |                                   |                                            | 0.976                                         |                                   |                                            |

\*Normalised pore pressure ratio = (pore pressure - hydrostatic pressure) / (confining pressure - hydrostatic pressure)

$A_p$ ; pre-exponential term;  $E_{a_s}$ , activation energy; An, n-dimensional nucleation; F3, third-order reaction

**Supplementary Table S3. Parameters used with the slip-weakening friction law at each depth under hydrostatic initial  $P_f$  condition**

| Location      | Depth (km) | Initial shear stress (MPa) | Yield shear stress (MPa) | Dynamic frictional stress (MPa) | Critical slip distance (m) | Correlation coefficient |
|---------------|------------|----------------------------|--------------------------|---------------------------------|----------------------------|-------------------------|
| Japan Trench  | 1          | 1.098                      | 2.667                    | 0.265                           | 3.949                      | 0.996                   |
|               | 2          | 2.197                      | 5.335                    | 0.289                           | 1.861                      | 0.993                   |
|               | 3          | 3.295                      | 8.003                    | 0.297                           | 1.153                      | 0.991                   |
|               | 4          | 4.394                      | 10.670                   | 0.295                           | 0.800                      | 0.990                   |
|               | 5          | 5.492                      | 13.338                   | 0.290                           | 0.589                      | 0.990                   |
|               | 6          | 6.590                      | 16.005                   | 0.292                           | 0.449                      | 0.990                   |
|               | 7          | 7.689                      | 18.673                   | 0.286                           | 0.351                      | 0.990                   |
|               | 8          | 8.787                      | 21.340                   | 0.276                           | 0.277                      | 0.990                   |
|               | 9          | 9.885                      | 24.007                   | 0.268                           | 0.221                      | 0.990                   |
|               | 10         | 10.984                     | 26.675                   | 0.267                           | 0.176                      | 0.990                   |
| Nankai Trough | 1          | 2.416                      | 5.806                    | 0.623                           | 0.963                      | 0.933                   |
|               | 2          | 4.833                      | 11.612                   | 0.524                           | 0.545                      | 0.936                   |
|               | 3          | 7.249                      | 17.417                   | 0.494                           | 0.380                      | 0.944                   |
|               | 4          | 9.666                      | 23.223                   | 0.471                           | 0.296                      | 0.952                   |
|               | 5          | 12.082                     | 29.029                   | 0.455                           | 0.247                      | 0.956                   |
|               | 6          | 14.499                     | 34.835                   | 0.433                           | 0.214                      | 0.963                   |
|               | 7          | 16.915                     | 40.640                   | 0.417                           | 0.190                      | 0.949                   |
|               | 8          | 19.332                     | 46.446                   | 0.402                           | 0.172                      | 0.953                   |
|               | 9          | 21.748                     | 52.252                   | 0.381                           | 0.159                      | 0.956                   |
|               | 10         | 24.164                     | 58.057                   | 0.361                           | 0.148                      | 0.960                   |

**Supplementary Table S4. Parameters used with the slip-weakening friction law at each depth under overpressured initial  $P_f$  condition**

| Location      | Depth (km) | Initial shear stress (MPa) | Yield shear stress (MPa) | Dynamic frictional stress (MPa) | Critical slip distance (m) | Correlation coefficient |
|---------------|------------|----------------------------|--------------------------|---------------------------------|----------------------------|-------------------------|
| Nankai Trough | 1          | 0.483                      | 1.161                    | 0.182                           | 3.145                      | 0.975                   |
|               | 2          | 0.967                      | 2.322                    | 0.375                           | 2.380                      | 0.960                   |
|               | 3          | 1.450                      | 3.484                    | 0.607                           | 1.572                      | 0.929                   |
|               | 4          | 1.933                      | 4.645                    | 0.558                           | 1.269                      | 0.930                   |
|               | 5          | 2.416                      | 5.806                    | 0.514                           | 1.050                      | 0.931                   |
|               | 6          | 2.900                      | 6.967                    | 0.476                           | 0.889                      | 0.932                   |
|               | 7          | 3.383                      | 8.128                    | 0.443                           | 0.766                      | 0.933                   |
|               | 8          | 3.866                      | 9.289                    | 0.414                           | 0.671                      | 0.934                   |
|               | 9          | 4.350                      | 10.450                   | 0.388                           | 0.596                      | 0.935                   |
|               | 10         | 4.833                      | 11.611                   | 0.365                           | 0.535                      | 0.937                   |

### Supplementary References:

111. Fine, R. A. & Millero, F. J. Compressibility of water as a function of temperature and pressure. *J. Chem. Phys.* **59**, 5529–5536 (1973).
112. Fulton, P. M. *et al.* Low coseismic friction on the Tohoku-Oki fault determined from temperature measurements. *Science* **342**, 1214–1217 (2013).
113. Sugiura, T. *et al.* Re-evaluation of temperature at the updip limit of locked portion of Nankai megasplay inferred from IODP Site C0002 temperature observatory. *Earth Planets Space* **66**:107 (2014).
114. Fontaine, F. J., Rabinowicz, M. & Boulegue, J. Permeability changes due to mineral diagenesis in fractured crust; Implications for hydrothermal circulation at mid-ocean ridges. *Earth Planet. Sci. Lett.* **184**, 407–425 (2001).
115. Hirono, T. & Hamada, Y. Specific heat capacity and thermal diffusivity and their temperature dependencies in a rock sample from adjacent to the Taiwan Chelungpu fault. *J. Geophys. Res.* **115**, B05313 (2010).
116. Bayer, G. Thermal expansion anisotropy of oxide compounds. *Proc. Br. Ceram. Soc.* **22**, 39–53 (1973).
